# Supplementary material for: Evolution of the assassin’s arms: insights from a phylogeny of combined transcriptomic and ribosomal DNA data (Heteroptera: Reduvioidea)
Source: PubMed Central journal article supplement (PMC4768186; doi:10.1038/srep22177), 2016-02-26
Supplement: srep22177-s1.pdf [file srep22177-s1.pdf]

## Supplementary information

Evolution of the assassin's arms: insights from a phylogeny of combined transcriptomic and ribosomal DNA data (Heteroptera: Reduvidae)

Junxia Zhang<sup>1\*</sup>, Eric R.L. Gordon<sup>1</sup>, Michael Forthman<sup>1</sup>, Wei Song Hwang<sup>2</sup>, Kim Walden<sup>3</sup>, Daniel R. Swanson<sup>3</sup>, Kevin P. Johnson<sup>3</sup>, Rudolf Meier<sup>2</sup>, Christiane Weirauch<sup>1</sup>

1. Department of Entomology, University of California, Riverside, Riverside, CA 92521, USA

2. Lee Kong Chian Natural History Museum, Department of Biological Sciences, National University of Singapore, 117377, Singapore

3. Illinois Natural History Survey, Prairie Research Institute, University of Illinois, Champaign, IL 61820, USA

\* Corresponding author. E-mail: [jxzhang1976@gmail.com](mailto:jxzhang1976@gmail.com)

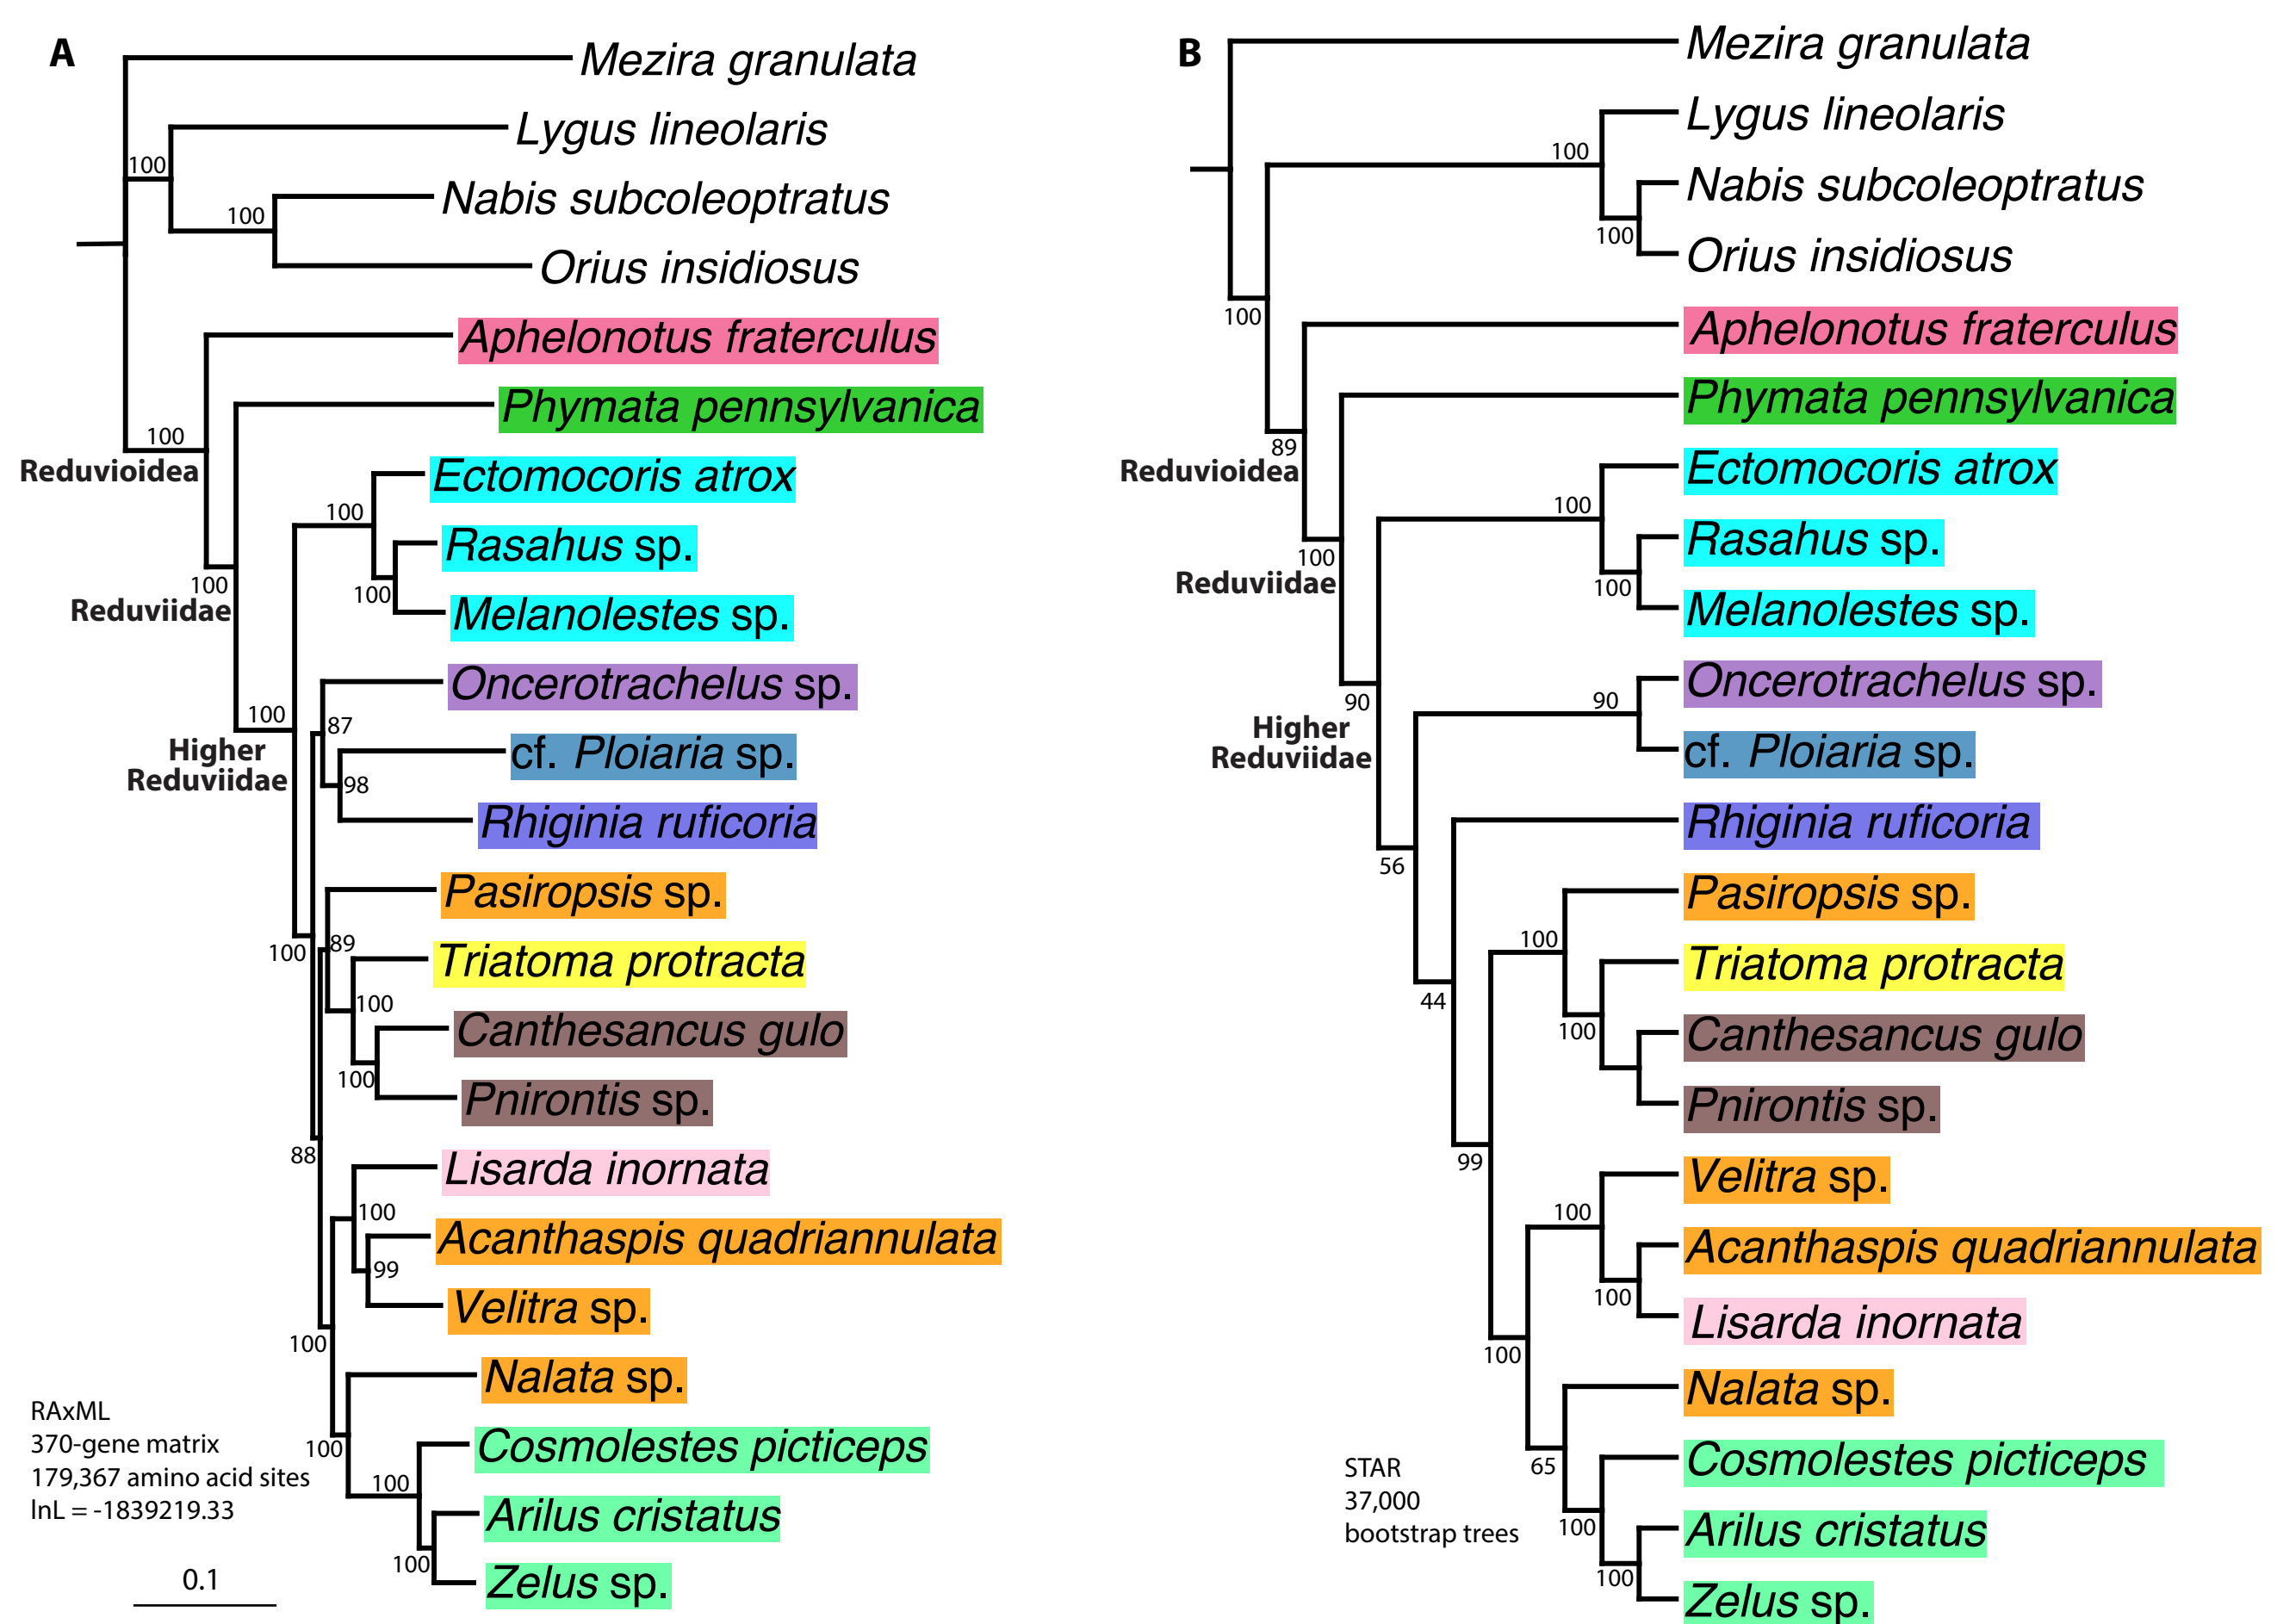

Figure S1. Phylogenies inferred from RAxML (1A) and STAR (1B) based on the transcriptomic dataset (23 transcriptomes; 370 genes).

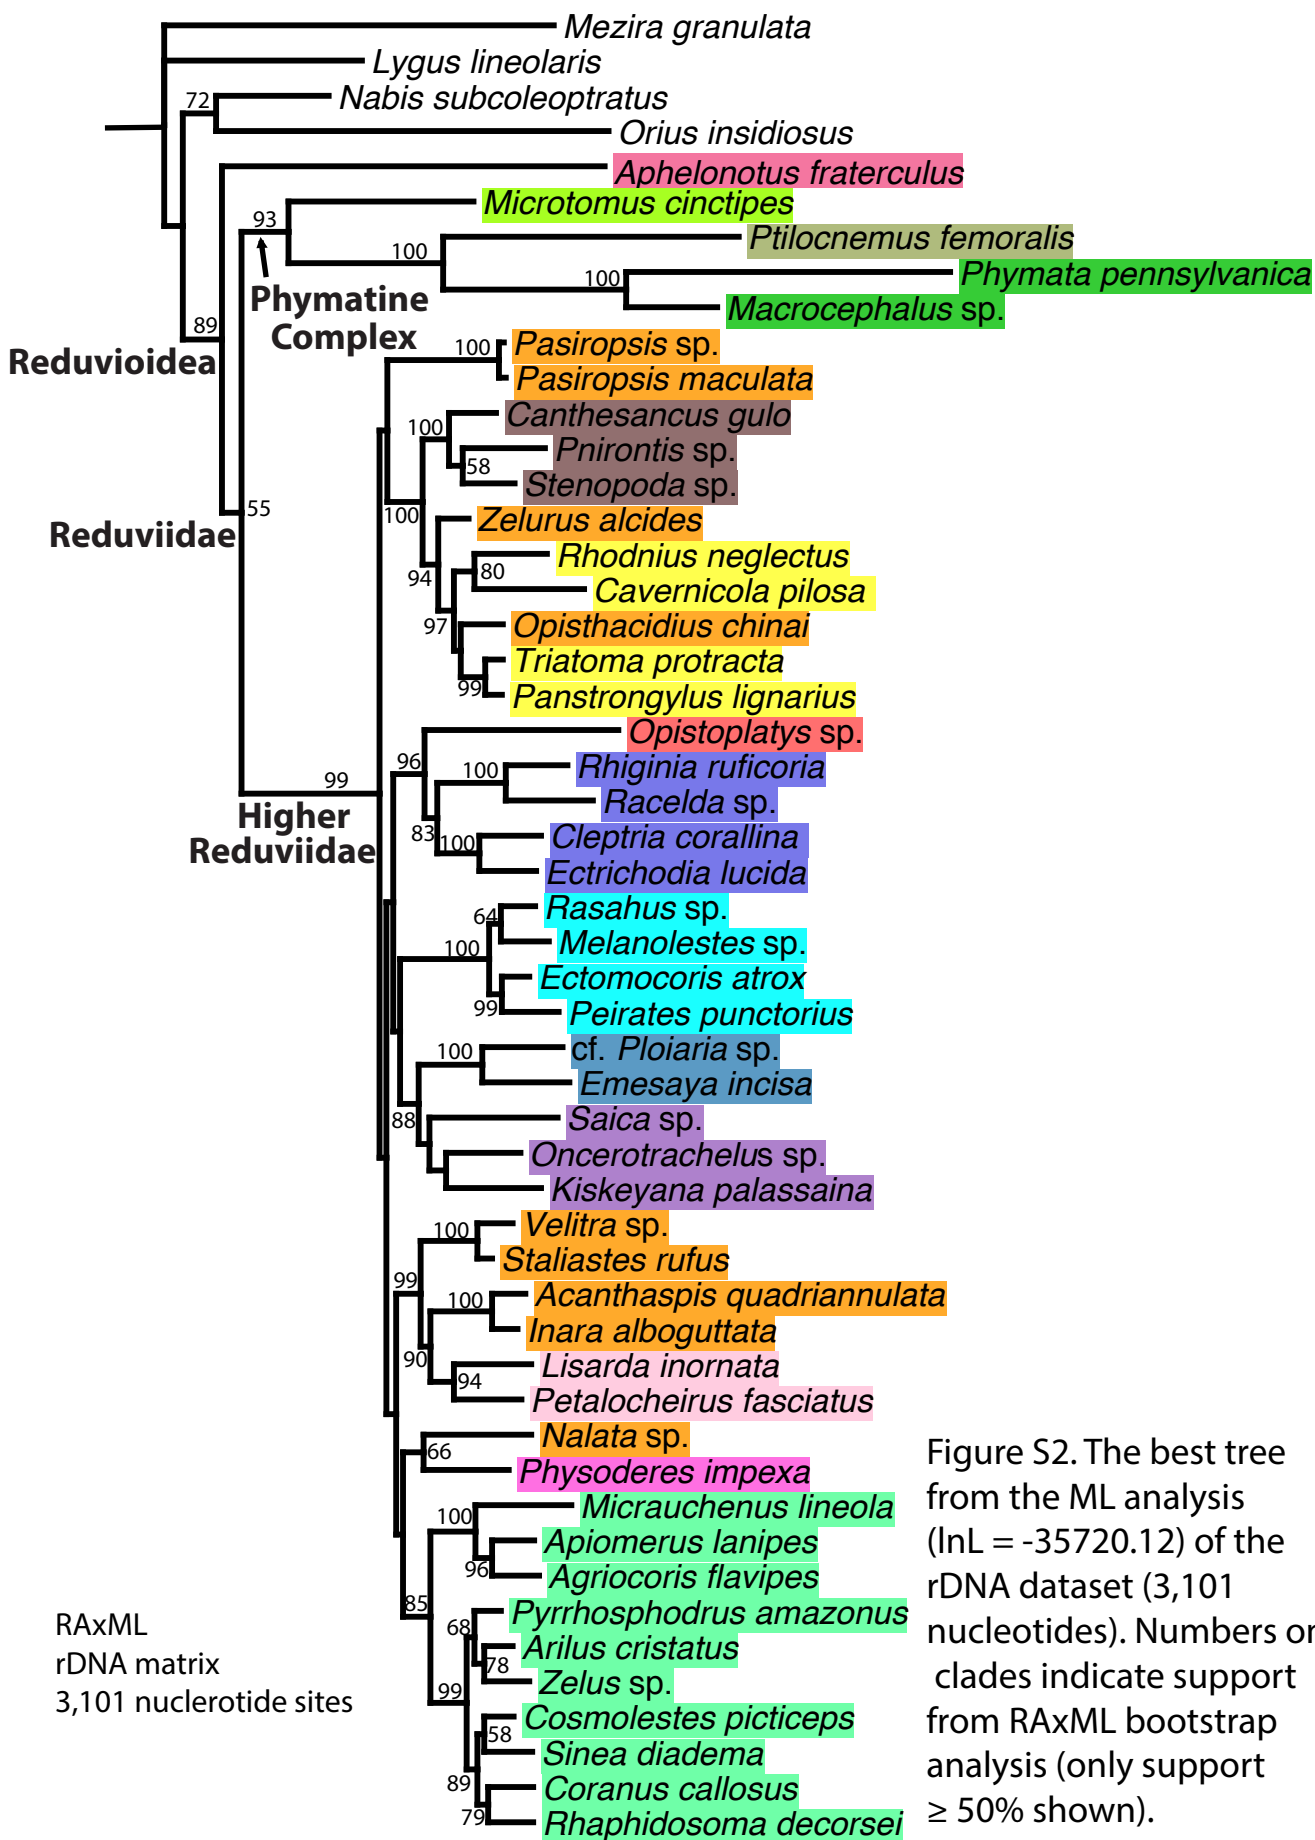

Figure S2. The best tree from the ML analysis (lnL = -35720.12) of the rDNA dataset (3,101 nucleotides). Numbers on clades indicate support from RAxML bootstrap analysis (only support  $\geq 50\%$  shown).

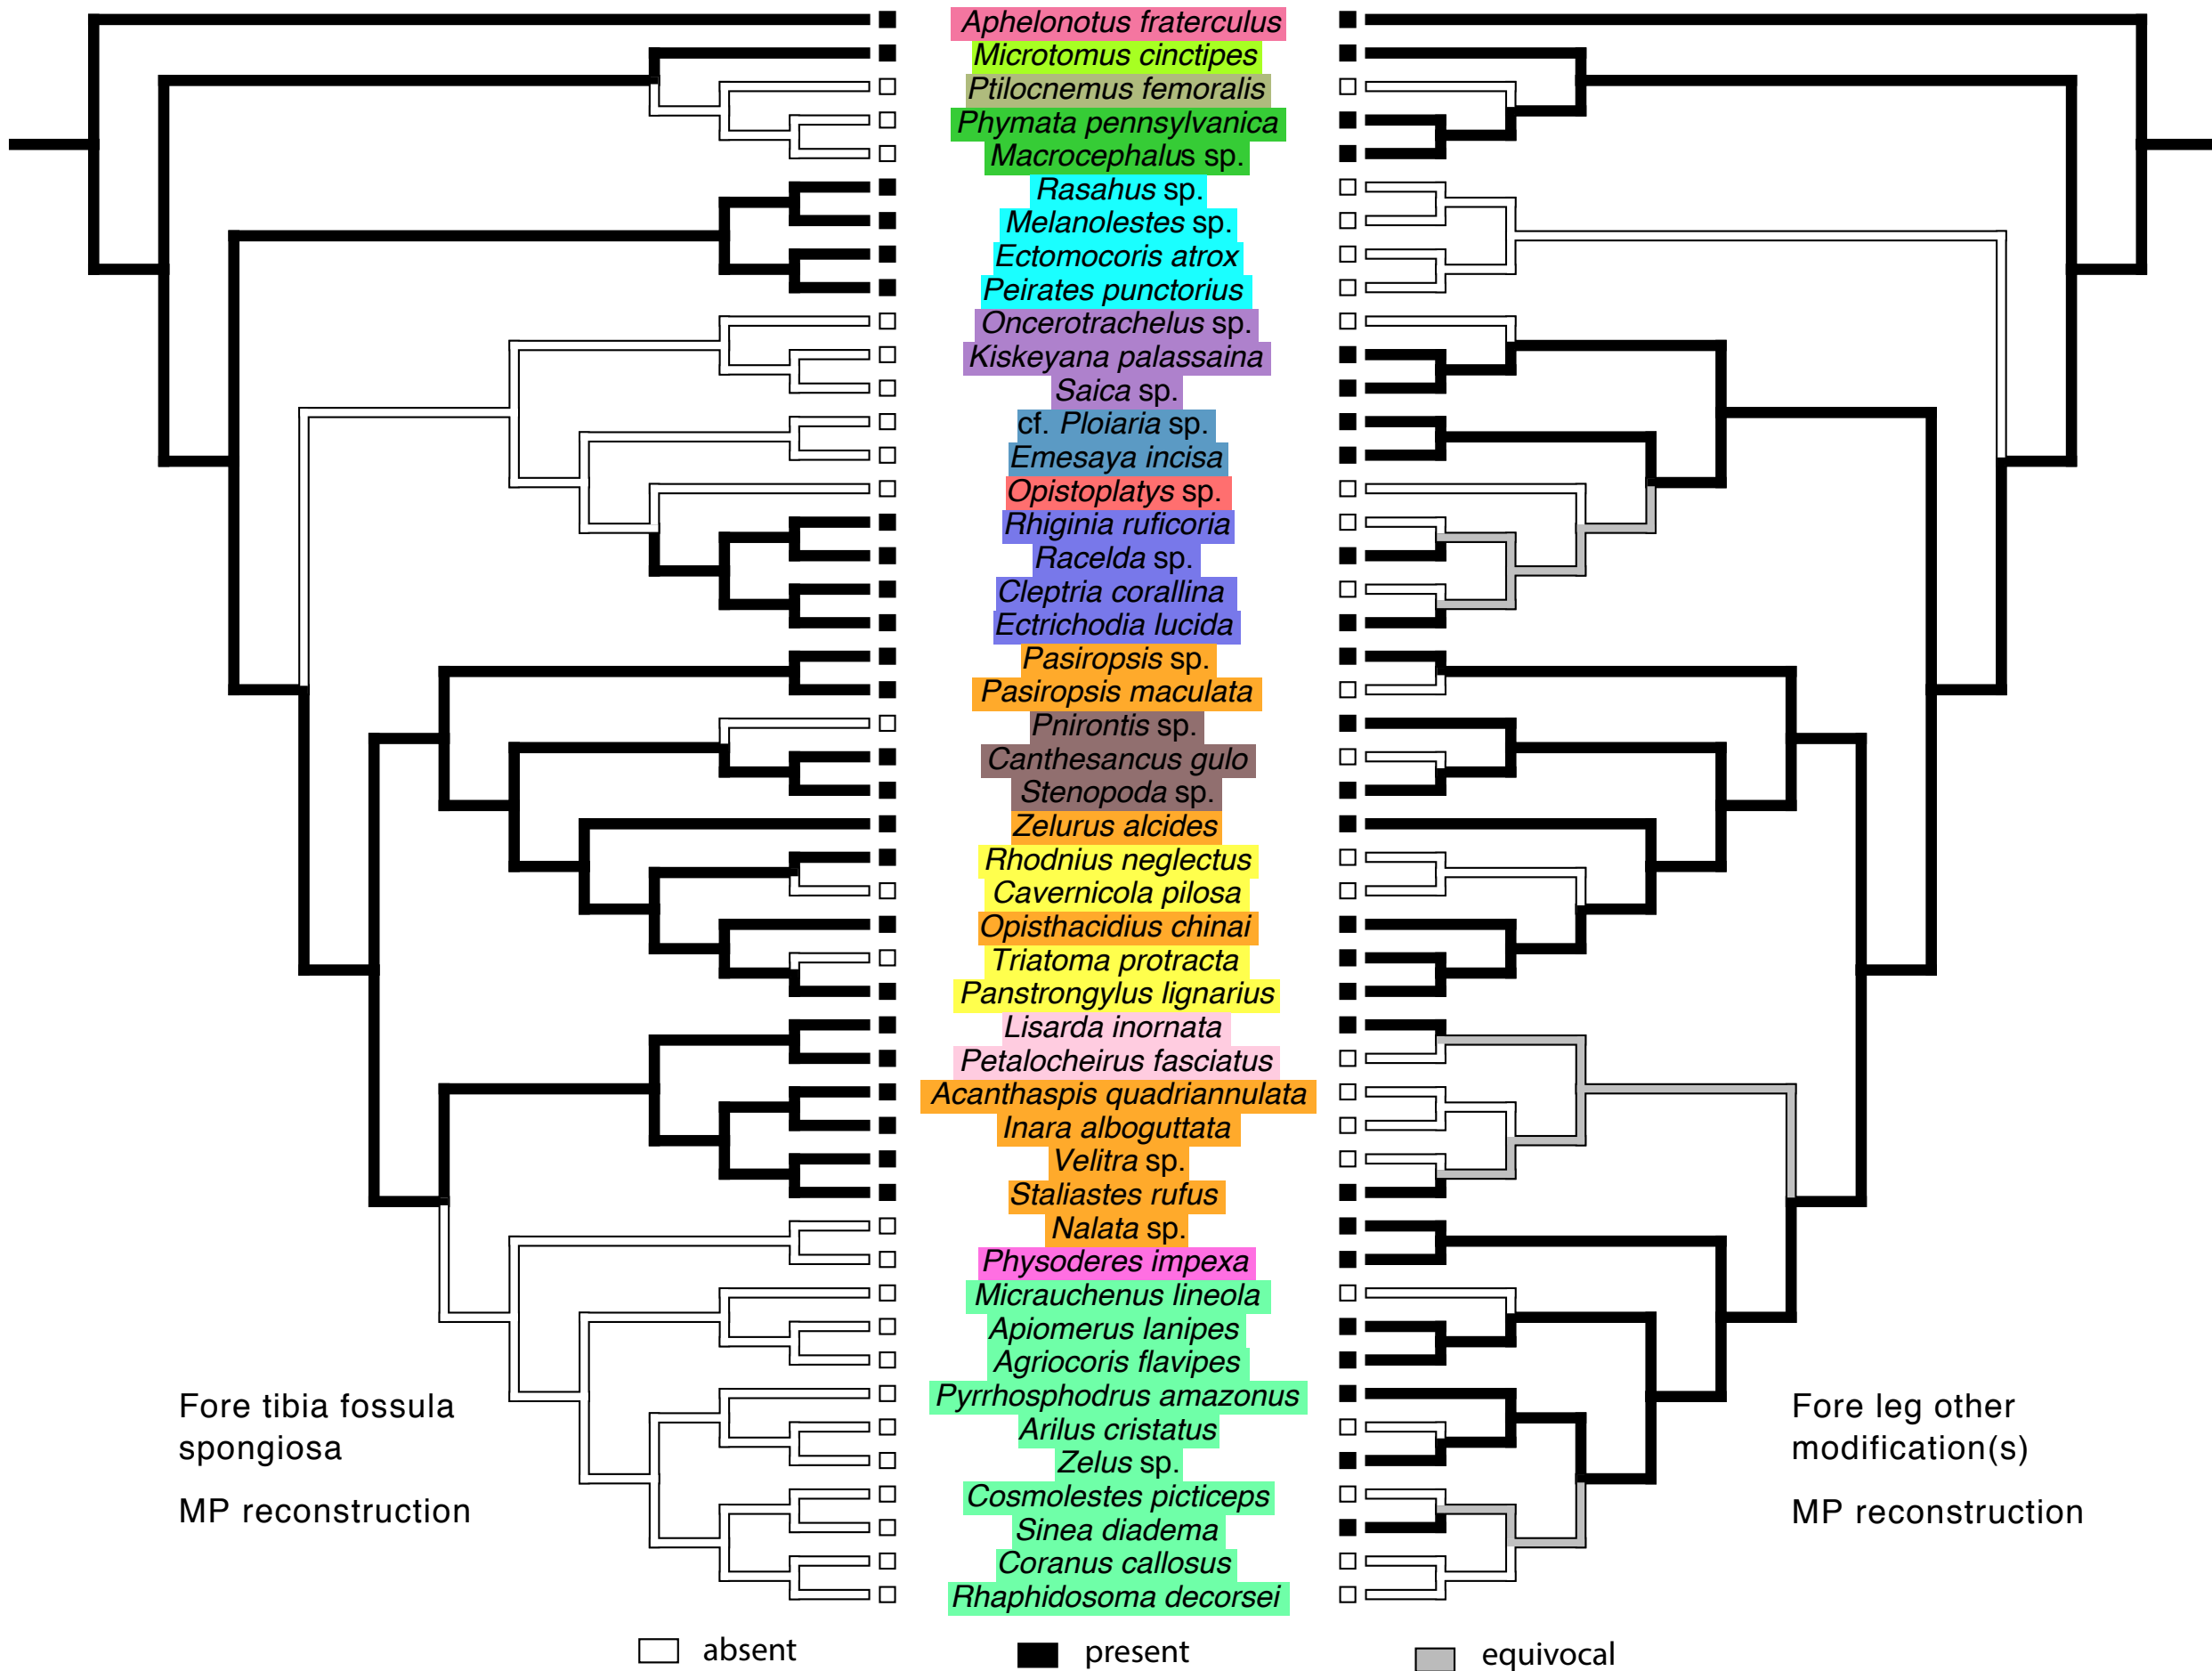

Figure S3. The evolution of the fossula spongiosa (left) and any other leg modification (right) in Reduvidae. The tree shown is the ML best tree from the T+R dataset with non-reduvioid taxa trimmed off. Ancestral states reconstructed using parsimony in Mesquite 2.75.

**Table S1.** List of species sampled in this study. Species names, specimen code, collection localities, transcriptome and rDNA gene information (GenBank accession number). (\*) denotes previously published sequences.

| Infraorder   | Family     | Subfamily      | Taxon                                            | Sample Code | Locality                          | Transcriptome | 16S             | 18S             | 28SD2           | 28SD3-5                 |
|--------------|------------|----------------|--------------------------------------------------|-------------|-----------------------------------|---------------|-----------------|-----------------|-----------------|-------------------------|
| Cimicomorpha | Reduviidae | Ectrichodiinae | <i>Cleptria corallina</i> Villiers               | RCW014      | Guinea-Bissau                     | no            | *FJ230388       | *FJ230462       | *FJ230543       | *FJ230621;<br>*FJ230700 |
| Cimicomorpha | Reduviidae | Ectrichodiinae | <i>Ectrichodia lucida</i> Lepelletier & Serville | RCW013      | Guinea-Bissau                     | no            | *FJ230387       | *FJ230461       | *FJ230542       | *FJ230620;<br>*FJ230699 |
| Cimicomorpha | Reduviidae | Ectrichodiinae | <i>Racelda</i> sp.                               | RCW041      | French Guiana: Approuague-Kaw     | no            | *FJ230398       | *FJ230472       | *FJ230553       | *FJ230631;<br>*FJ230710 |
| Cimicomorpha | Reduviidae | Ectrichodiinae | <i>Rhiginia ruficoria</i> Maldonado              | RCW3947     | Argentina: Santiago del Estero    | yes           | <b>KT231822</b> | <b>KT231845</b> | <b>KT231864</b> | <b>KT231885</b>         |
| Cimicomorpha | Reduviidae | Emesinae       | <i>Emesaya incisa</i> (McAtee & Malloc)          | RCW282      | USA: California                   | no            | *FJ230436       | *FJ230515       | *FJ230598       | *FJ230672;<br>*FJ230751 |
| Cimicomorpha | Reduviidae | Emesinae       | cf. <i>Ploiaria</i> sp.                          | RCW3916     | Dominican Republic: La Altagracia | yes           | <b>KT231821</b> | <b>KT231844</b> | <b>KT231863</b> | <b>KT231884</b>         |
| Cimicomorpha | Reduviidae | Hammacerinae   | <i>Microtomus cinctipes</i> (Stål)               | RCW141      | Nicaragua                         | no            | *FJ230411       | *FJ230491       | no              | *FJ230649;<br>*FJ230728 |
| Cimicomorpha | Reduviidae | Harpactorinae  | <i>Agriocoris flavipes</i> (Fabricius)           | RCW132      | French Guiana: Cayenne            | no            | *JQ942236       | *FJ230488       | *FJ230569       | *FJ230646;<br>*FJ230725 |
| Cimicomorpha | Reduviidae | Harpactorinae  | <i>Apiomerus lanipes</i> (Fabricius)             | RCW281      | Argentina: Santiago del Estero    | no            | *FJ230435       | *FJ230514       | *FJ230597       | *FJ230671;<br>*FJ230750 |
| Cimicomorpha | Reduviidae | Harpactorinae  | <i>Ariulus cristatus</i> (Linnaeus)              | P025        | USA: Illinois                     | yes           | <b>KT231832</b> | <b>KT231855</b> | <b>KT231873</b> | <b>KT231895</b>         |
| Cimicomorpha | Reduviidae | Harpactorinae  | <i>Coranus callosus</i> Stål                     | RCW244      | Australia: Western Australia      | no            | *FJ230433       | *FJ230511       | *FJ230594       | *FJ230669;<br>*FJ230748 |

|              |            |               |                                           |              |                            |     |                 |                 |                 |                         |
|--------------|------------|---------------|-------------------------------------------|--------------|----------------------------|-----|-----------------|-----------------|-----------------|-------------------------|
| Cimicomorpha | Reduviidae | Harpactorinae | <i>Cosmolestes picticeps</i> (Stål)       | ROU010       | Singapore: Mandai          | yes | <b>KT231831</b> | <b>KT231854</b> | <b>KT231872</b> | <b>KT231894</b>         |
| Cimicomorpha | Reduviidae | Harpactorinae | <i>Micrauchenus lineola</i> (Fabricius)   | RCW035       | French Guiana              | no  | *FJ230397       | *FJ230471       | *FJ230552       | *FJ230630;<br>*FJ230709 |
| Cimicomorpha | Reduviidae | Harpactorinae | <i>Pyrrhosphodrus amazonus</i> (Champion) | RCW031       | French Guiana: Montsinery  | no  | *FJ230396       | *FJ230470       | *FJ230551       | *FJ230629;<br>*FJ230708 |
| Cimicomorpha | Reduviidae | Harpactorinae | <i>Rhaphidosoma decorsei</i> Jeannel      | RCW017       | Senegal: Thies             | no  | *FJ230390       | *FJ230464       | *FJ230545       | *FJ230622;<br>*FJ230701 |
| Cimicomorpha | Reduviidae | Harpactorinae | <i>Sinea diadema</i> Caudell              | RCW108       | Mexico: Chihuahua          | no  | *FJ230408       | *FJ230485       | *FJ230566       | *FJ230644;<br>*FJ230723 |
| Cimicomorpha | Reduviidae | Harpactorinae | <i>Zelus</i> sp.                          | RCW3869      | USA: California            | yes | <b>KT231833</b> | <b>KT231856</b> | <b>KT231874</b> | <b>KT231896</b>         |
| Cimicomorpha | Reduviidae | Holoptilinae  | <i>Ptilocnemus femoralis</i> Horvath      | RCW220       | Australia: South Australia | no  | *FJ230431       | *FJ230509       | *FJ230591       | *FJ230667;<br>*FJ230746 |
| Cimicomorpha | Reduviidae | Peiratinae    | <i>Ectomocoris atrox</i> (Stål)           | ROU006       | Singapore: Seletar         | yes | <b>KT231819</b> | <b>KT231842</b> | <b>KT231861</b> | <b>KT231882</b>         |
| Cimicomorpha | Reduviidae | Peiratinae    | <i>Melanolestes</i> sp.                   | RCW3946      | Argentina: Misiones        | yes | <b>KT231818</b> | <b>KT231841</b> | <b>KT231860</b> | <b>KT231881</b>         |
| Cimicomorpha | Reduviidae | Peiratinae    | <i>Peirates punctorius</i> (Stål)         | RCW216       | Australia: New South Wales | no  | *FJ230430       | *FJ230508       | *FJ230590       | *FJ230666;<br>*FJ230745 |
| Cimicomorpha | Reduviidae | Peiratinae    | <i>Rasahus</i> sp.                        | RCW3821      | Costa Rica                 | yes | <b>KT231817</b> | <b>KT231840</b> | <b>KT231859</b> | <b>KT231880</b>         |
| Cimicomorpha | Reduviidae | Phymatinae    | <i>Macrocephalus</i> sp.                  | RCW128       | Mexico: Chihuahua          | no  | *FJ230409       | *FJ230487       | *FJ230568       | *FJ230645;<br>*FJ230724 |
| Cimicomorpha | Reduviidae | Phymatinae    | <i>Phymata pennsylvanica</i> Handlirsch   | INHS-780,184 | USA: Illinois              | yes | <b>KT231816</b> | <b>KT231839</b> | <b>KT231858</b> | <b>KT231879</b>         |
| Cimicomorpha | Reduviidae | Physoderinae  | <i>Physoderes impexa</i> (Distant)        | RCW1572      | Vietnam: Vinh Phuc         | no  | *JQ897830       | *JQ897591       | *JQ897662       | *JQ897748               |
| Cimicomorpha | Reduviidae | Reduviinae    | <i>Acanthaspis quadriannulata</i> Stål    | ROU007       | Singapore: Nee Soon        | yes | <b>KT231823</b> | <b>KT231846</b> | <b>KT231865</b> | <b>KT231886</b>         |
| Cimicomorpha | Reduviidae | Reduviinae    | <i>Inara alboguttata</i> Stål             | RCW1164      | Thailand; Nakhon Nayok     | no  | *JQ897801       | *JQ897561       | *JQ897640       | *JQ897718               |

|              |            |               |                                                |         |                               |     |                 |                 |                 |                         |
|--------------|------------|---------------|------------------------------------------------|---------|-------------------------------|-----|-----------------|-----------------|-----------------|-------------------------|
| Cimicomorpha | Reduviidae | Reduviinae    | <i>Nalata</i> sp.                              | RCW3822 | Costa Rica                    | yes | <b>KT231826</b> | <b>KT231849</b> | <b>KT231868</b> | <b>KT231889</b>         |
| Cimicomorpha | Reduviidae | Reduviinae    | <i>Opisthacidius chinai</i> Lent & Wygodzinsky | RCW1285 | Peru                          | no  | *JQ897819       | *JQ897580       | *JQ897652       | *JQ897737               |
| Cimicomorpha | Reduviidae | Reduviinae    | <i>Pasiropsis maculata</i> Distant             | RCW810  | Thailand                      | no  | *JQ897825       | *JQ897586       | *JQ897658       | *JQ897743               |
| Cimicomorpha | Reduviidae | Reduviinae    | <i>Pasiropsis</i> sp.                          | ROU009  | Singapore: Nee Soon           | yes | <b>KT231824</b> | <b>KT231847</b> | <b>KT231866</b> | <b>KT231887</b>         |
| Cimicomorpha | Reduviidae | Reduviinae    | <i>Staliastes rufus</i> (Laporte)              | RCW690  | Laos                          | no  | *JQ897842       | *JQ897604       | *JQ897673       | *JQ897758               |
| Cimicomorpha | Reduviidae | Reduviinae    | <i>Velitra</i> sp.                             | ROU012  | Singapore: Rifle Range Road   | yes | <b>KT231825</b> | <b>KT231848</b> | <b>KT231867</b> | <b>KT231888</b>         |
| Cimicomorpha | Reduviidae | Reduviinae    | <i>Zelurus alcides</i> (Stål)                  | RCW1571 | Costa Rica: Heredia           | no  | *JQ897855       | *JQ897615       | *JQ897686       | *JQ897771               |
| Cimicomorpha | Reduviidae | Saicinae      | <i>Kiskeyana palassaina</i> Weirauch & Forero  | RCW010  | Dominican Republic            | no  | no              | *FJ230460       | *FJ230541       | *FJ230619;<br>*FJ230698 |
| Cimicomorpha | Reduviidae | Saicinae      | <i>Oncerothelusus</i> sp.                      | RCW3825 | Costa Rica                    | yes | <b>KT231820</b> | <b>KT231843</b> | <b>KT231862</b> | <b>KT231883</b>         |
| Cimicomorpha | Reduviidae | Saicinae      | <i>Saica</i> sp.                               | RCW042  | French Guiana: Approuague-Kaw | no  | *FJ230399       | *FJ230473       | *FJ230554       | *FJ230632;<br>*FJ230711 |
| Cimicomorpha | Reduviidae | Salyavatinae  | <i>Lisarda inornata</i> (Walker)               | ROU008  | Singapore: Sime track         | yes | <b>KT231830</b> | <b>KT231853</b> | no              | <b>KT231893</b>         |
| Cimicomorpha | Reduviidae | Salyavatinae  | <i>Petalochirus fasciatus</i> Distant          | RCW812  | Thailand; Nakhon Si Thammarat | no  | *KP236992       | *KP236966       | *KP236940       | *KP237023               |
| Cimicomorpha | Reduviidae | Stenopodainae | <i>Canthesancus gulo</i> Stål                  | ROU005  | Singapore: Seletar            | yes | <b>KT231828</b> | <b>KT231851</b> | <b>KT231870</b> | <b>KT231891</b>         |
| Cimicomorpha | Reduviidae | Stenopodainae | <i>Pnirontis</i> sp.                           | RCW3945 | Argentina: Misiones           | yes | <b>KT231829</b> | <b>KT231852</b> | <b>KT231871</b> | <b>KT231892</b>         |
| Cimicomorpha | Reduviidae | Stenopodainae | <i>Stenopoda</i> sp.                           | RCW154  | Nicaragua: Granada            | no  | *FJ230414       | *FJ230493       | *FJ230574       | *FJ230651;<br>*FJ230730 |

|                 |              |                   |                                               |              |                            |     |                 |                 |                 |                 |
|-----------------|--------------|-------------------|-----------------------------------------------|--------------|----------------------------|-----|-----------------|-----------------|-----------------|-----------------|
| Cimicomorpha    | Reduviidae   | Triatominae       | <i>Cavernicola pilosa</i> Barber              | RCW2847      | Nicaragua:<br>Rio San Juan | no  | *JQ897785       | *JQ897550       | *JQ897627       | *JQ897704       |
| Cimicomorpha    | Reduviidae   | Triatominae       | <i>Panstrongylus lignarius</i> (Walker)       | RCW1813      | French Guiana:<br>Roura    | no  | *JQ897823       | *JQ897584       | *JQ897656       | *JQ897741       |
| Cimicomorpha    | Reduviidae   | Triatominae       | <i>Rhodnius neglectus</i> Lent                | RCW1573      | Ecuador:<br>Orellana       | no  | *JQ897839       | *JQ897601       | *JQ897670       | *JQ897755       |
| Cimicomorpha    | Reduviidae   | Triatominae       | <i>Triatoma protracta</i> Uhler               | ROU011       | USA:<br>California         | yes | <b>KT231827</b> | <b>KT231850</b> | <b>KT231869</b> | <b>KT231890</b> |
| Cimicomorpha    | Reduviidae   | Tribelocephalinae | <i>Opisthoplatys</i> sp.                      | RCW1592      | Brunei:<br>Belait          | no  | *JQ897851       | *JQ897612       | *JQ897682       | *JQ897767       |
| Cimicomorpha    | Pachynomidae | Aphelonotinae     | <i>Aphelonotus fraterculus</i> Harris         | RCW3830      | Costa Rica:<br>Guanacaste  | yes | <b>KT231815</b> | <b>KT231838</b> | <b>KT231857</b> | <b>KT231878</b> |
| Cimicomorpha    | Miridae      | Mirinae           | <i>Lygus lineolaris</i> (Palisot de Beauvois) | INHS-780,185 | USA: Illinois              | yes | *AY252649       | <b>KT231835</b> | no              | <b>KT231875</b> |
| Cimicomorpha    | Nabidae      | Nabinae           | <i>Nabis subcoleopratus</i> (Kirby)           | INHS-780,193 | USA: South Dakota          | yes | no              | <b>KT231836</b> | no              | <b>KT231876</b> |
| Cimicomorpha    | Anthocoridae | Oriini            | <i>Orius insidiosus</i> (Say)                 | INHS-780,194 | USA: Illinois              | yes | <b>KT231814</b> | <b>KT231837</b> | no              | <b>KT231877</b> |
| Pentatomomorpha | Aradiidae    | Mezirinae         | <i>Mezira granulata</i> (Say)                 | INHS-780,195 | USA: Illinois              | yes | *AY252694       | <b>KT231834</b> | no              | no              |



**Table S2.** Illumina RNA-seq, quality trimming, de novo assembly, and HaMStR ortholog prediction results, showing the number of paired-end raw reads generated for each library, the number of filtered raw reads after quality trimming for de novo assembly, the number of assembled contigs with their average length and N50, the number of ortholog genes (OGs) from HaMStR, and the completeness in the concatenated matrix (calculated as the proportion of non-gap sites in the matrix). 370 protein-coding genes that cover all 23 taxa are used for phylogenetic analyses.

| Family       | Subfamily      | Taxon                                         | # Raw Reads | # Filtered Reads | # Contigs | Average Length of Contigs | N50 of Contigs | # OGs | Completeness (%) |
|--------------|----------------|-----------------------------------------------|-------------|------------------|-----------|---------------------------|----------------|-------|------------------|
| Reduviidae   | Phymatinae     | <i>Phymata pennsylvanica</i> Handlirsch       | 59,164,110  | 55,152,329       | 28,686    | 929                       | 1,302          | 1,617 | 90.2             |
| Reduviidae   | Peiratinae     | <i>Ectomocoris atrox</i> (Stål)               | 60,708,978  | 57,693,491       | 23,489    | 1,134                     | 1,708          | 1,671 | 96.4             |
| Reduviidae   | Peiratinae     | <i>Melanolestes</i> sp.                       | 45,434,656  | 43,563,840       | 21,523    | 978                       | 1,369          | 1,687 | 94.8             |
| Reduviidae   | Peiratinae     | <i>Rasahus</i> sp.                            | 50,766,124  | 46,816,267       | 21,201    | 1,031                     | 1,449          | 1,660 | 91.1             |
| Reduviidae   | Saicinae       | <i>Oncerotrachelus</i> sp.                    | 51,921,462  | 47,908,459       | 24,779    | 1,126                     | 1,704          | 1,692 | 95.3             |
| Reduviidae   | Emesinae       | cf. <i>Ploiaria</i> sp.                       | 35,413,568  | 33,996,569       | 27,594    | 922                       | 1,207          | 1,669 | 86.2             |
| Reduviidae   | Ectrichodiinae | <i>Rhiginia ruficoria</i> Maldonado           | 41,997,172  | 40,391,579       | 20,155    | 857                       | 1,062          | 1,538 | 73.8             |
| Reduviidae   | Reduviinae     | <i>Acanthaspis quadriannulata</i> Stål        | 36,274,778  | 34,535,692       | 21,613    | 1,062                     | 1,511          | 1,582 | 91.4             |
| Reduviidae   | Reduviinae     | <i>Pasiropsis</i> sp.                         | 45,732,464  | 43,719,356       | 31,208    | 1,052                     | 1,528          | 1,706 | 94.9             |
| Reduviidae   | Reduviinae     | <i>Velitra</i> sp.                            | 45,706,512  | 43,233,262       | 32,617    | 930                       | 1,252          | 1,631 | 88.6             |
| Reduviidae   | Reduviinae     | <i>Nalata</i> sp.                             | 56,725,054  | 52,251,972       | 30,341    | 1,062                     | 1,574          | 1,674 | 95.5             |
| Reduviidae   | Stenopodainae  | <i>Canthesancus gulo</i> Stål                 | 46,225,452  | 44,191,605       | 18,875    | 938                       | 1,223          | 1,473 | 79.0             |
| Reduviidae   | Stenopodainae  | <i>Pnirontis</i> sp.                          | 46,197,746  | 44,427,838       | 26,371    | 923                       | 1,237          | 1,671 | 88.8             |
| Reduviidae   | Salyavatinae   | <i>Lisarda inornata</i> (Walker)              | 48,007,458  | 45,762,541       | 30,613    | 1,106                     | 1,649          | 1,647 | 95.5             |
| Reduviidae   | Triatominae    | <i>Triatoma protracta</i> Uhler               | 57,591,970  | 54,638,744       | 39,000    | 1,055                     | 1,560          | 1,673 | 95.4             |
| Reduviidae   | Harpactorinae  | <i>Aريلus cristatus</i> (Linnaeus)            | 56,077,314  | 48,995,858       | 23,901    | 997                       | 1,399          | 1,637 | 92.9             |
| Reduviidae   | Harpactorinae  | <i>Zelus</i> sp.                              | 55,174,874  | 51,198,146       | 27,330    | 1,080                     | 1,588          | 1,683 | 96.3             |
| Reduviidae   | Harpactorinae  | <i>Cosmolestes picticeps</i> (Stål)           | 42,559,608  | 40,613,067       | 24,166    | 1,109                     | 1,590          | 1,655 | 95.7             |
| Pachynomidae | Aphelonotinae  | <i>Aphelonotus fraterculus</i> Harris         | 54,026,628  | 49,466,008       | 26,339    | 973                       | 1,352          | 1,535 | 79.0             |
| Miridae      | Mirinae        | <i>Lygus lineolaris</i> (Palisot de Beauvois) | 49,691,658  | 45,520,824       | 29,487    | 1,155                     | 1,787          | 1,692 | 95.6             |
| Nabidae      | Nabinae        | <i>Nabis subcoleopratus</i> (Kirby)           | 47,076,394  | 43,642,823       | 25,265    | 1,110                     | 1,696          | 1,708 | 96.2             |
| Anthocoridae | Oriini         | <i>Orius insidiosus</i> (Say)                 | 48,882,610  | 44,996,984       | 19,245    | 1,252                     | 1,882          | 1,675 | 93.3             |
| Aradiidae    | Mezirinae      | <i>Mezira granulata</i> (Say)                 | 52,534,656  | 48,880,819       | 34,824    | 952                       | 1,340          | 1,681 | 86.2             |

**Table S3.** Summary of correlation tests using Bayesian and maximum likelihood methods in BayesTraits, showing that the dependent model is not significantly better than the independent model for each character pair with  $BF < 6$  and  $LR < 9.488$  ( $p > 0.2$ ,  $d.f. = 4$ ).

| Character Pair                                   | MCMC                |             |                   | ML               |             |                       |
|--------------------------------------------------|---------------------|-------------|-------------------|------------------|-------------|-----------------------|
|                                                  | log (harmonic mean) |             | Bayes Factor (BF) | log (likelihood) |             | Likelihood Ratio (LR) |
|                                                  | Dependent           | Independent |                   | Dependent        | Independent |                       |
| 1-2: Fossula Spongiosa-Chela/Subchela            | -30.780             | -30.119     | -1.323            | -24.370          | -25.685     | 2.629                 |
| 1-3: Fossula Spongiosa-Trochanter armature       | -52.172             | -48.497     | -7.351            | -45.779          | -45.906     | 0.254                 |
| 1-4: Fossula Spongiosa-Femur armature            | -55.362             | -55.644     | 0.565             | -49.446          | -51.161     | 3.430                 |
| 1-5: Fossula Spongiosa-Tibia armature            | -54.898             | -54.143     | -1.511            | -48.294          | -50.203     | 3.818                 |
| 1-6: Fossula Spongiosa-Sticky trap               | -37.449             | -37.335     | -0.228            | -30.581          | -32.359     | 3.555                 |
| 1-7: Fossula Spongiosa-Any of other modification | -61.169             | -59.890     | -2.557            | -53.281          | -54.360     | 2.157                 |
